# Supplementary material for: A Whole Germline BRCA2 Gene Deletion: How to Learn from CNV In Silico Analysis
Source: MDPI journal article supplement (doi:10.3390/ijms19040961), 2018-03-23
Supplement: s1 [file s1]

**a**

## Report BRCA1/2

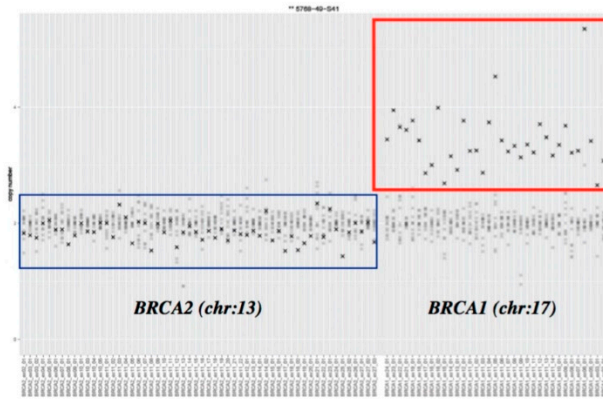

## BRCA1

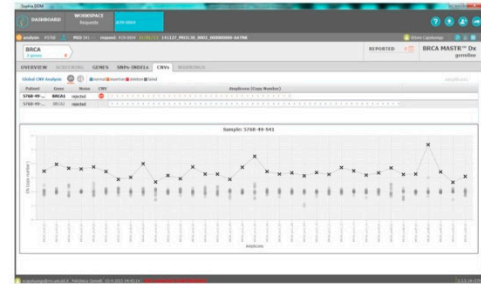

## BRCA2

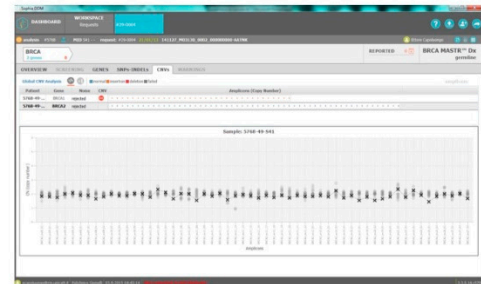

**b**

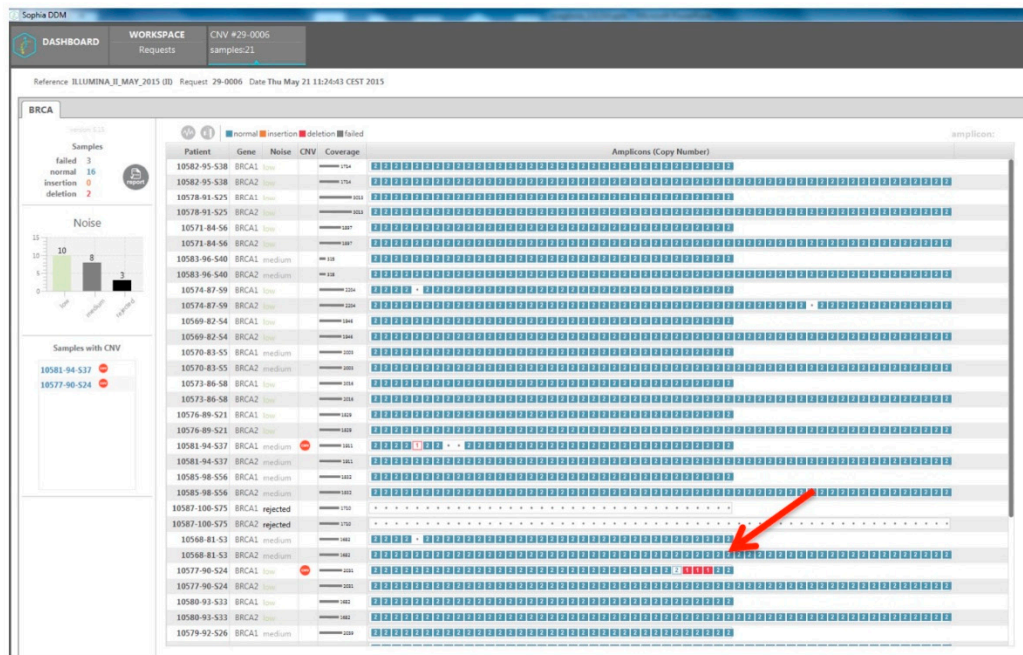

**Figure S1.** *In silico* CNV analysis with Sophia DDM performed on MiSeq run dataset on V3 chip. **(A)** The raw data of the CNV prediction of the *Sample 5*, carrying whole germline *BRCA2* deletion, is reported on the left. The details of CNV estimations for *BRCA1* and *BRCA2* are represented on the right. **(B)** The sample carrying the deletion of *BRCA1* exons 5-7 is indicated by the red arrow.
